# Supplementary material for: Red emitting Y2O3:Eu3+nanophosphors with >80% down conversion efficiency
Source: Royal Society of Chemistry journal article supplement (doi:10.1039/c3tc31939c), 2013-10-23
Supplement: c3tc31939c.pdf [file c3tc31939c.pdf]

### Supporting Information

## Red Emitting $\text{Y}_2\text{O}_3:\text{Eu}^{3+}$ Nanophosphors with > 80% down Conversion Efficiency

A.P. Jadhav,<sup>a,b</sup> A. U. Pawar,<sup>a</sup> U. Pal,<sup>c</sup> and Y. S. Kang<sup>a\*</sup>

<sup>a</sup> Department of Chemistry, Sogang University, Seoul, 121-742, Republic of Korea.

<sup>b</sup> Center for Materials Architecturing, Korea Institute of Science and Technology, Hwarangno 14-gil 5, Seongbuk-gu, Seoul, 136-791, Republic of Korea.

<sup>c</sup> Instituto de Fisica, Benemerita Universidad Autonoma de Puebla, Apodo, Postal J-48, Puebla 72570, Mexico.

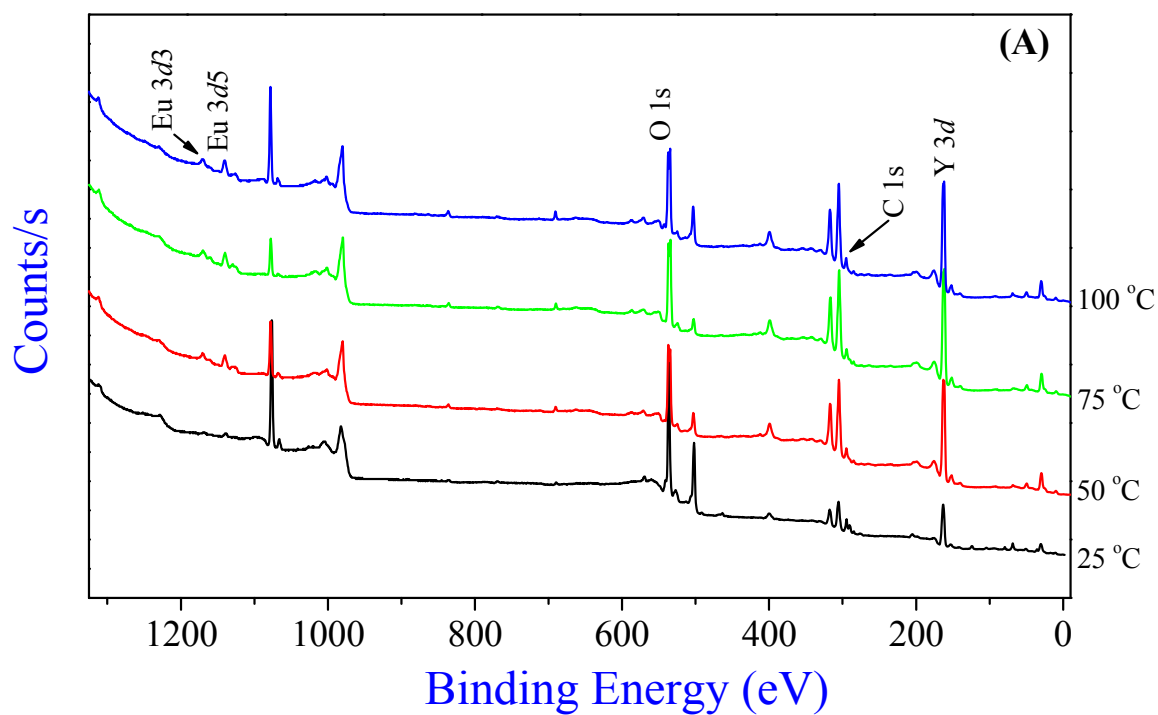

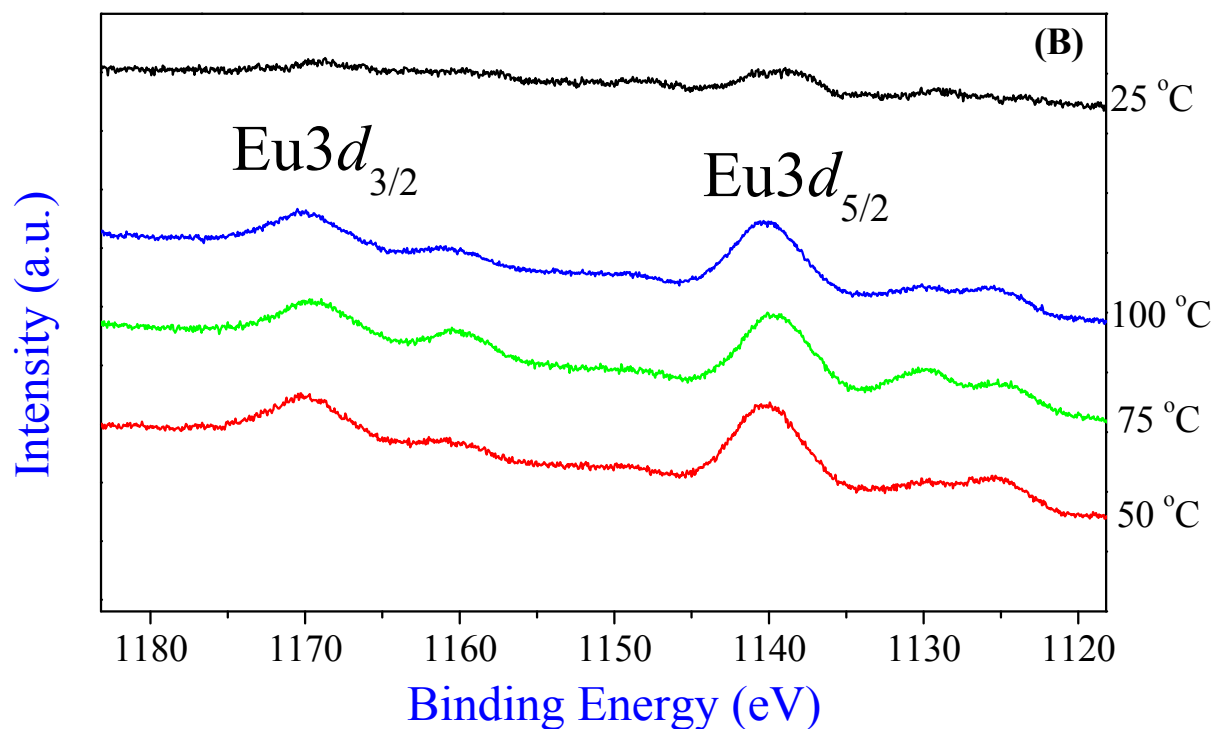

**Figure S1.** XPS (a) survey and (b) high resolution at Eu3d spectra of the Y<sub>2</sub>O<sub>3</sub>:Eu<sup>3+</sup> nanoparticles synthesized at 25, 50, 75 and 100 °C.

Comparative XPS survey spectra of Y<sub>2</sub>O<sub>3</sub>:Eu<sup>3+</sup> samples synthesized at different temperatures are presented in Figure S1 (a). All the spectra revealed photoelectron peaks correspond to Y3d, O1s, C1s and Eu3d emissions. All the emission peak positions were corrected using the C1s peak position at 284.6 eV as reference. The surface composition of the samples was estimated from their high resolution XPS (Table 1) spectra. As has been presented in Table 1, though the nominal concentration of Eu in all the samples was kept fixed (Y: Eu = 95:5), only about 0.23 atom % of Eu was introduced into the particles when synthesized at room temperature. However, the concentration of the incorporated Eu increased on increasing the reaction temperature. Figure S1 (b) shows the high resolution XPS emission spectra of the Y<sub>2</sub>O<sub>3</sub>:Eu<sup>3+</sup> samples in the Eu3d region. The Eu3d peak splits into two sub-peaks Eu3d<sub>5/2</sub> and Eu3d<sub>3/2</sub>. The binding energy positions of the Eu3d<sub>5/2</sub> peak for the samples synthesized at 25, 50,

75 and 100 °C were revealed at about 1138.95, 1140.35, 1140.10 and 1140.35 eV, respectively and  $\text{Eu}3d_{3/2}$  peaks shows binding energy around 1170.20 eV. However, the binding energy of the  $\text{Eu}3d_{5/2}$  peak in  $\text{Eu}_2\text{O}_3$  is reported to be at about 1135.6 eV.<sup>[R1]</sup> The positive chemical shifts of  $\text{Eu}3d_{5/2}$  peak observed in our europium doped  $\text{Y}_2\text{O}_3$  samples indicate that the incorporated  $\text{Eu}^{3+}$  ions occupy interstitial sites of the  $\text{Y}_2\text{O}_3$  host lattice.<sup>[R1]</sup> As can be observed from the Table 1, the concentration of Eu in the nanoparticles increased with the increase of synthesis temperature.  $\text{Y}_2\text{O}_3$  crystal has a cubic lattice with space group  $Ia\bar{3}$ , where  $\frac{3}{4}$  of  $\text{Y}^{3+}$  ions occupy the low symmetric  $\text{C}_2$  sites and  $\frac{1}{4}$  of  $\text{Y}^{3+}$  occupy high symmetric  $\text{S}_6$  sites. If the  $\text{Eu}^{3+}$  ions occupy the low symmetry sites of the host lattice, the selection rule will be broken partially and the 614 nm emission would be strengthened greatly, weakening the transition at 594 nm.<sup>[R2-R7]</sup>  $\text{Eu}^{3+}$  ion prefers to replace  $\text{Y}^{3+}$  ion at lower symmetric  $\text{C}_2$  sites. As reaction temperature increases, more and more  $\text{Y}^{3+}$  ions at  $\text{C}_2$  sites will get replaced by  $\text{Eu}^{3+}$  ions, increasing the activator concentration in host lattice.

#### Supporting Information References:

- [R1] J. P. Duraud, F. Jollet, N. Thromat, M. Gautier, P. Marie, C. le Gressus, E. Dartyge, *J. Am. Ceram. Soc.* **1990**, *73*, 2467.
- [R2] E. T. Goldburt, B. Kulkarni, R. N. Bhargava, J. Taylor and M. Libera, *J. Lumin.* 1997, 72-74, 190.
- [R3] S. R. Sheen, D. H. Chen, B. F. Hsu, C. T. Chang, C. Y. Shei, J. C. Huang, Y. L. Sun, T. Sugimoto, E. Matijevic, *J. Inorg. Nucl. Chem.* **1979**, *41*, 165.
- [R4] Z. L. Wang, Y. Liu, Z. Zheng, in *Handbook of Nanophase and Nanostructured Materials*, vol. 1, Kluwer Academic/ Plenum Publishers, Tsinghua University Press, NY, **2003**.

[R5] V. N. Anh, T. K., G. C. Yi, W. Streak, *J. Lumin.* **2007**, 122-123, 776.

[R6] S. Shinoya, W. M. Yen, H. Takashi, in *Phosphor Handbook*, CRC Press, Boca Raton, FL, **1999**, p. 122.

[R7] K. H. Butler, in *Fluorescent Lamp Phosphors Technology and Theory*, University park and London, The Pennsylvania State University Press, **1980**, p. 15,.
